# Supplementary material for: Diagnosis of Forme Fruste Keratoconus Using Corvis ST Sequences with Digital Image Correlation and Machine Learning
Source: MDPI journal article supplement (doi:10.3390/bioengineering11050429), 2024-04-26
Supplement: s1 [file s1]

# Diagnosis of Forme Fruste Keratoconus Using Corvis ST Sequences with Digital Image Correlation and Machine Learning

**Lanting Yang**<sup>1,2,3,†</sup>, **Kehan Qi**<sup>4,5,†</sup>, **Peipei Zhang**<sup>1,2,3,†</sup>, **Jiaxuan Cheng**<sup>1,2,3</sup>, **Hera Soha**<sup>1,2,3</sup>, **Yun Jin**<sup>6,7</sup>, **Haochen Ci**<sup>6,7</sup>, **Xianling Zheng**<sup>6,7</sup>, **Bo Wang**<sup>6,7</sup>, **Yue Mei**<sup>6,7</sup>, **Shihao Chen**<sup>1,2,3,\*</sup> and **Junjie Wang**<sup>1,2,3,8,\*</sup>

<sup>1</sup> National Engineering Research Center of Ophthalmology and Optometry, Eye Hospital, Wenzhou Medical University, Wenzhou 325027, China; [landy.yang@foxmail.com](mailto:landy.yang@foxmail.com) (L.Y.); [wmu\\_zhangpeipei@163.com](mailto:wmu_zhangpeipei@163.com) (P.Z.); [chengjx0321@163.com](mailto:chengjx0321@163.com) (J.C.); [h.soha97@hotmail.com](mailto:h.soha97@hotmail.com) (H.S.)

<sup>2</sup> State Key Laboratory of Ophthalmology, Optometry and Visual Science, Eye Hospital, Wenzhou Medical University, Wenzhou 325027, China

<sup>3</sup> National Clinical Research Center for Ocular Diseases, Eye Hospital, Wenzhou Medical University, Wenzhou 325027, China

<sup>4</sup> Shenzhen Institute of Advanced Technology, Chinese Academy of Sciences, Shenzhen 518055, China; [qikehan@zju.edu.cn](mailto:qikehan@zju.edu.cn)

<sup>5</sup> University of Chinese Academy of Sciences, Beijing 101408, China

<sup>6</sup> State Key Laboratory of Structural Analysis, Optimization and CAE Software for Industrial Equipment, Department of Engineering Mechanics, Dalian University of Technology, Dalian 116023, China; [jinyun@mail.dlut.edu.cn](mailto:jinyun@mail.dlut.edu.cn) (Y.J.); [chcc@mail.dlut.edu.cn](mailto:chcc@mail.dlut.edu.cn) (H.C.); [xianlingzheng@mail.dlut.edu.cn](mailto:xianlingzheng@mail.dlut.edu.cn) (X.Z.); [bo.wang@dlut.edu.cn](mailto:bo.wang@dlut.edu.cn) (B.W.); [meiyue@dlut.edu.cn](mailto:meiyue@dlut.edu.cn) (Y.M.)

<sup>7</sup> International Research Center for Computational Mechanics, Dalian University of Technology, Dalian 116023, China

<sup>8</sup> Department of Ophthalmology, Sichuan Mental Health Center, Mianyang 621054, China

\* Correspondence: [csh@eye.ac.cn](mailto:csh@eye.ac.cn) (S.C.); [junjie.wang@wmu.edu.cn](mailto:junjie.wang@wmu.edu.cn) (J.W.)

† These authors contributed equally to this work.

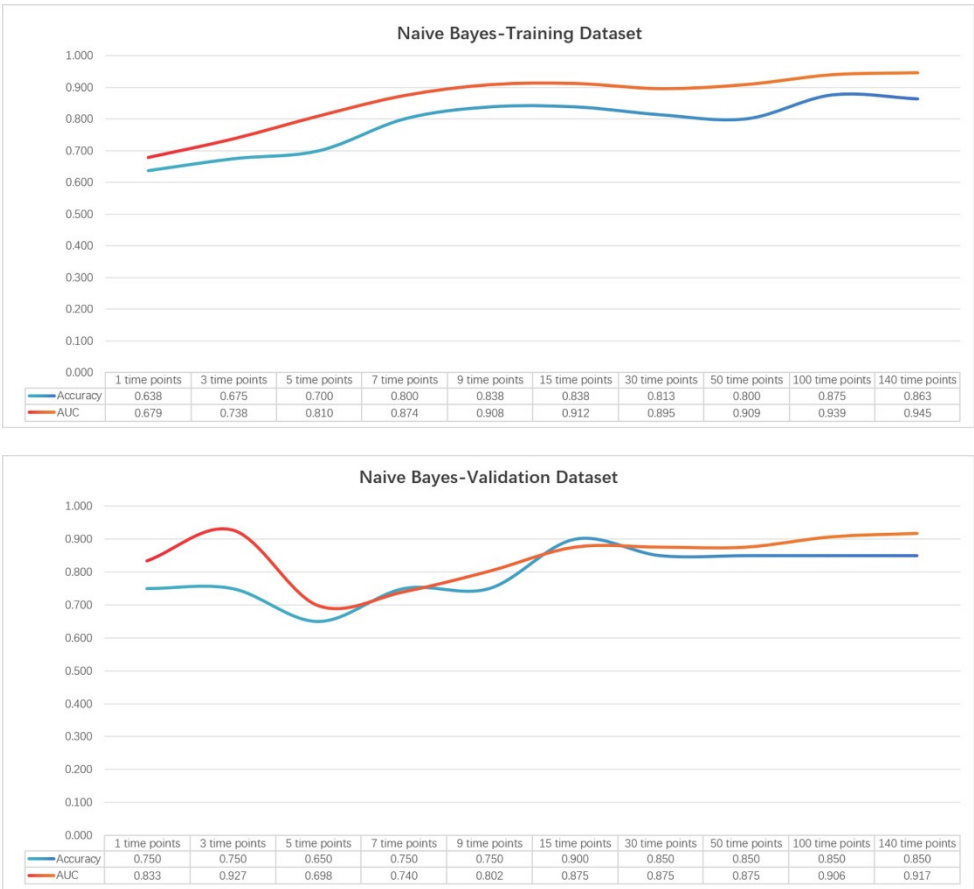

**Figure S1.** The performance of the Naïve Bayes model when incorporating data with different time points. AUC: area under the receiver operating characteristic curve.

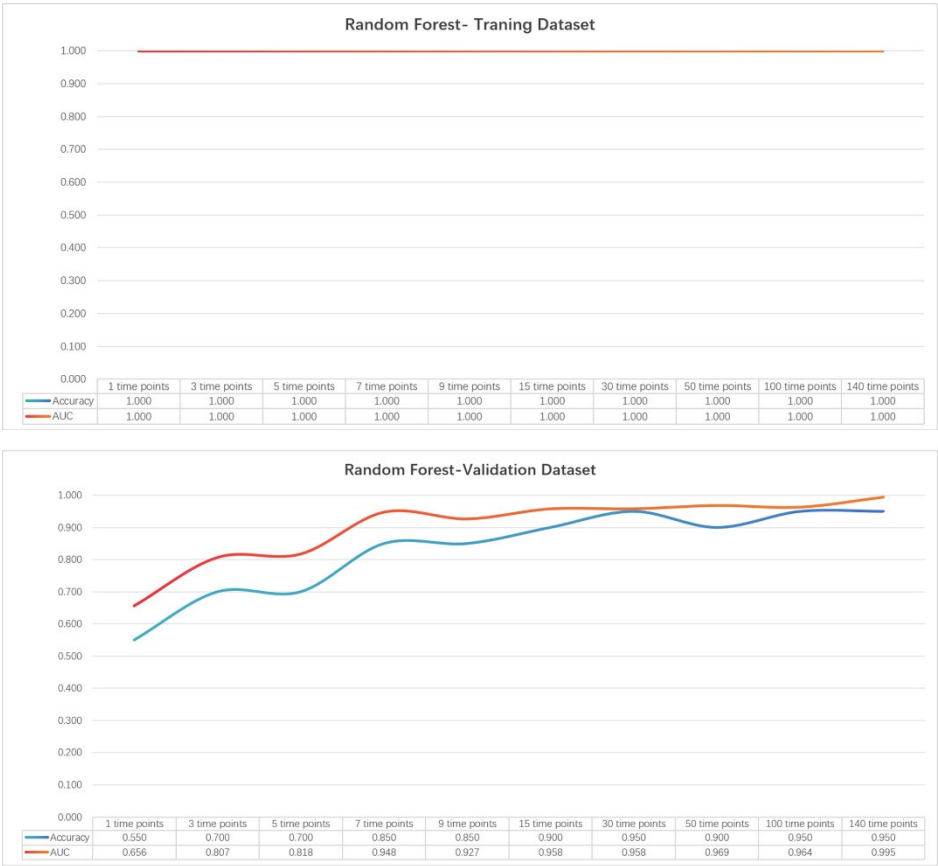

**Figure S2.** The performance of the Random Forest model when incorporating data with different time points. AUC: area under the receiver operating characteristic curve.

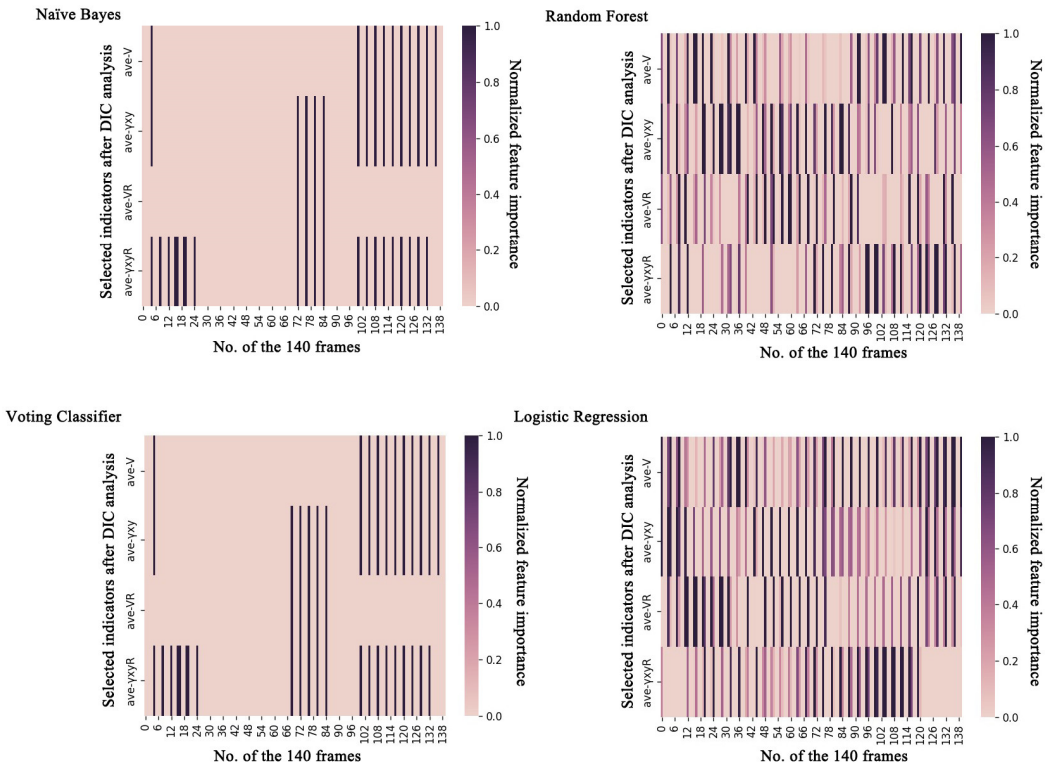

**Figure S3.** The feature importance of the machine learning models.**Table S1.** The 5-fold cross-validation results of the ML models (Final score from 5 folds cross-validation).

| ML models           | Accuracy (%) | Precision | Recall | F1-Score | Sensitivity | Specificity | AUC  |
|---------------------|--------------|-----------|--------|----------|-------------|-------------|------|
| Naïve Bayes         | 78.00        | 0.71      | 0.91   | 0.79     | 0.91        | 0.63        | 0.82 |
| Random Forest       | 83.00        | 0.85      | 0.83   | 0.82     | 0.83        | 0.89        | 0.90 |
| Voting Classifier   | 78.00        | 0.71      | 0.91   | 0.79     | 0.91        | 0.63        | 0.90 |
| Logistic Regression | 75.00        | 0.72      | 0.88   | 0.78     | 0.88        | 0.64        | 0.83 |

**Table S2.** The complete ROC analysis results of Corvis ST parameters in differentiating FFKC from normal cornea.

| Variable                              | AUC   | Sensitivity (%) | Specificity (%) |
|---------------------------------------|-------|-----------------|-----------------|
| Radius [mm]                           | 0.948 | 100.000         | 87.500          |
| A2 Time [ms]                          | 0.938 | 75.000          | 100.000         |
| Max Inverse Radius [mm]               | 0.932 | 83.330          | 100.000         |
| SPA1 [mmHg/mm]                        | 0.927 | 83.330          | 100.000         |
| cCBI                                  | 0.927 | 91.670          | 100.000         |
| CBI                                   | 0.917 | 91.670          | 100.000         |
| SSI2                                  | 0.906 | 91.670          | 87.500          |
| A1 Time [ms]                          | 0.896 | 83.330          | 100.000         |
| SPHC [mmHg/mm]                        | 0.896 | 91.670          | 87.500          |
| Integrated Radius [mm]                | 0.865 | 75.000          | 100.000         |
| AP1 [mmHg]                            | 0.854 | 66.670          | 100.000         |
| Whole Eye Movement Max [ms]           | 0.854 | 91.670          | 75.000          |
| PachySlope [ $\mu$ m]                 | 0.844 | 66.670          | 100.000         |
| A2 dArc Length [mm]                   | 0.786 | 75.000          | 87.500          |
| DA Ratio Max 2mm                      | 0.771 | 83.330          | 75.000          |
| DA Ratio Max 1mm                      | 0.771 | 83.330          | 75.000          |
| AP2 [mmHg]                            | 0.760 | 66.670          | 100.000         |
| A1 Deflection Length [mm]             | 0.760 | 50.000          | 100.000         |
| dArc Length Max [mm]                  | 0.750 | 75.000          | 75.000          |
| A2 Deflection Area [mm <sup>2</sup> ] | 0.729 | 50.000          | 100.000         |
| bIOP [mmHg]                           | 0.724 | 50.000          | 100.000         |
| HC dArc Length [mm]                   | 0.724 | 100.000         | 37.500          |
| A1 Deflection Amp [mm]                | 0.719 | 83.330          | 62.500          |
| HC Time [ms]                          | 0.708 | 58.330          | 100.000         |
| Def. Amp. Max [mm]                    | 0.708 | 58.330          | 87.500          |
| HC Deformation Amp. [mm]              | 0.708 | 58.330          | 87.500          |
| HC Deflection Amp. [mm]               | 0.698 | 58.330          | 75.000          |
| Deflection Amp. Max [mm]              | 0.693 | 75.000          | 62.500          |
| simK3mm [mm]                          | 0.688 | 58.330          | 87.500          |
| A2 Deflection Amp. [mm]               | 0.677 | 50.000          | 100.000         |
| A2 Deflection Length [mm]             | 0.677 | 83.330          | 62.500          |
| Deflection Amp. Max [ms]              | 0.677 | 100.000         | 50.000          |
| Zonalk7mm [mm]                        | 0.677 | 66.670          | 87.500          |
| HC Deflection Area [mm <sup>2</sup> ] | 0.635 | 58.330          | 75.000          |
| A1 dArc Length [mm]                   | 0.630 | 91.670          | 37.500          |
| A1 Deflection Velocity [m/s]          | 0.620 | 75.000          | 50.000          |
| A2 Deflection Velocity [m/s]          | 0.615 | 41.670          | 100.000         |

---

|                                       |       |        |         |
|---------------------------------------|-------|--------|---------|
| A1 Deformation Amp. [mm]              | 0.615 | 83.330 | 50.000  |
| A1 Velocity [m/s]                     | 0.609 | 33.330 | 100.000 |
| A2 Deformation Amp. [mm]              | 0.583 | 50.000 | 87.500  |
| Whole Eye Movement Max [mm]           | 0.583 | 91.670 | 37.500  |
| A2 Velocity [m/s]                     | 0.573 | 41.670 | 100.000 |
| SSI                                   | 0.563 | 50.000 | 75.000  |
| Peak Dist. [mm]                       | 0.547 | 58.330 | 62.500  |
| ARTh                                  | 0.542 | 41.670 | 100.000 |
| HC Deflection Length [mm]             | 0.521 | 50.000 | 75.000  |
| A1 Deflection Area [mm <sup>2</sup> ] | 0.510 | 75.000 | 0.000   |

---
